# Supplementary material for: A Biocontrol Strain of Pseudomonas aeruginosa CQ-40 Promote Growth and Control Botrytis cinerea in Tomato
Source: PubMed Central journal article supplement (PMC7824093; doi:10.3390/pathogens10010022), 2020-12-31
Supplement: pathogens-10-00022-s001.pdf [file pathogens-10-00022-s001.pdf]

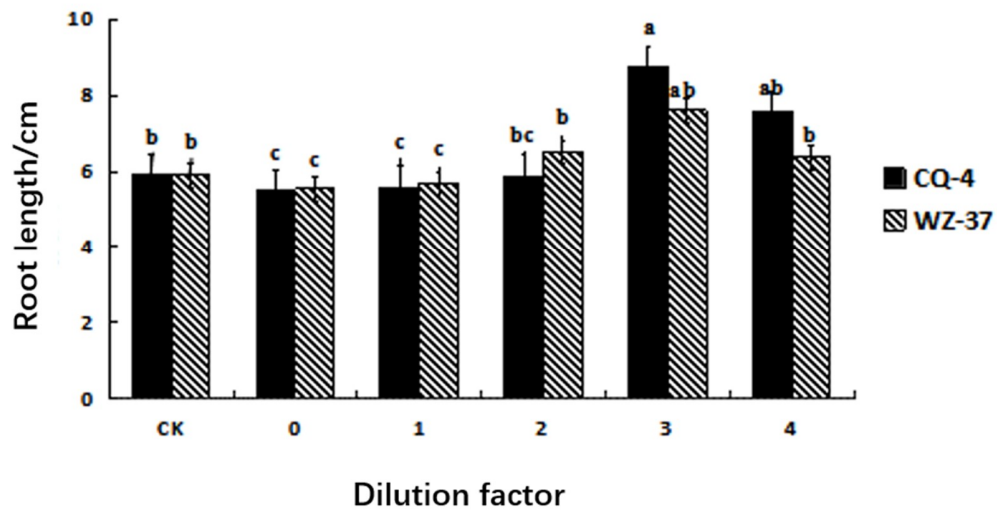

Figure S1. Effect of different dilutions of bacterial suspension on the growth of tomato seed radicle.

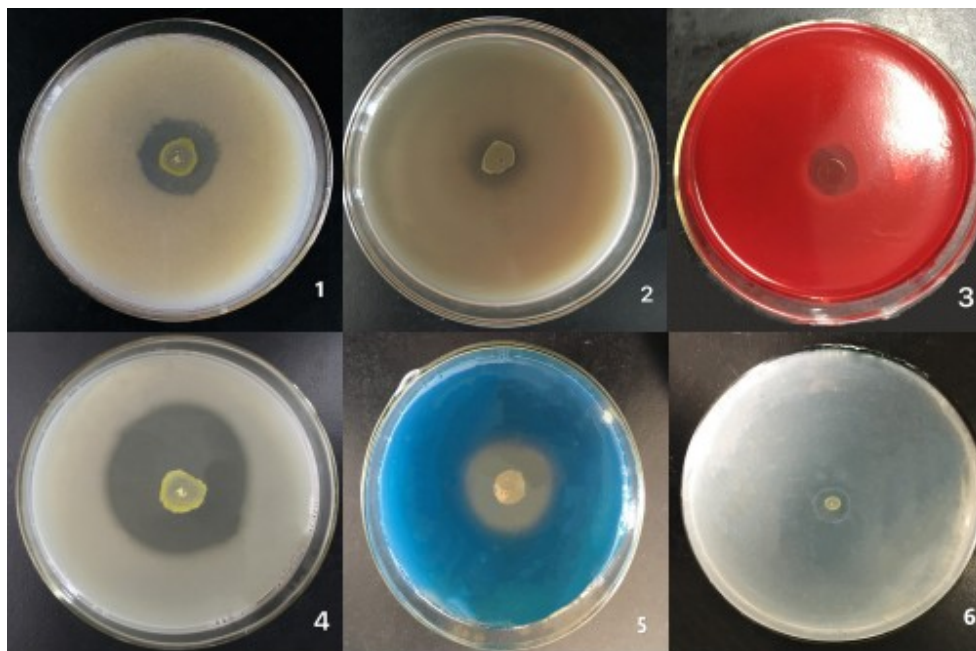

Figure S2. Detection of secretory substance in strains CQ-4.

Note: 1: Inorganic phosphorus 2: Organic phosphorus 3: Cellulase 4: Protease 5: Siderophore 6: Nitrogen fixation

**Table S1.** Physiological and biochemical characteristics of CQ-4.

| Identification index                   | Strain CQ-4          |
|----------------------------------------|----------------------|
| Fluorescence                           | Yellow green pigment |
| Salt tolerance                         | ≤5%                  |
| gram stain                             | G-                   |
| Glucose oxidation / fermentation (O/F) | O                    |
| Starch hydrolysis                      | +                    |
| Catalase test                          | +                    |
| Aerobic or anaerobic                   | Aerobic              |
| Nitrate reduction reaction             | +                    |
| Gelatin liquefaction                   | +                    |
| Citrate reaction                       | +                    |
| Urease reaction                        | +                    |
| Methyl red reaction                    | -                    |
| V.P.                                   | -                    |
| H <sub>2</sub> S                       | -                    |
| Indole                                 | -                    |

**Table S2.** Antibacterial spectrum of biocontrol bacteria CQ-4.

| Pathogenic bacteria                                    | Inhibition zone width /mm |           |
|--------------------------------------------------------|---------------------------|-----------|
|                                                        | CQ-4                      | WZ-37     |
| <i>Botrytis cinerea</i>                                | 9.6±0.3ab                 | 8.1±0.1ab |
| <i>Fusarium bulbigenum</i> var.<br><i>lycopersici</i>  | 10.8±0.2ab                | 7.3±0.1bc |
| <i>Fusarium oxysporum</i> f.sp.<br><i>niveum</i>       | 9.3±0.1bc                 | 6.5±0.2cd |
| <i>Fusarium oxysporum</i> (Schl.)<br>f.sp.             | 10.3±0.6a                 | 5.2±0.3e  |
| <i>Fusarium oxysporum</i> f. sp.<br><i>Pythium</i> sp. | 7.0±0.3c                  | 5.3±0.2e  |
| <i>Pythium</i> sp.                                     | 7.2±0.4c                  | 5.2±0.3e  |
| <i>Sclerotinia sclerotiorum</i><br>(Lib.) de Bary      | 8.5±0.3bc                 | 9.0±0.4a  |

|                           |            |            |
|---------------------------|------------|------------|
| Fusarium graminearum      | 5.2±0.1e   | 8.3±0.3ab  |
| Fusarium sp.              | 4.0±0.2e   | 8.5±0.2a   |
| Colletotrichum lagenarium | 7.0±0.1c   | 6.0±0.2cd  |
| Bean anthracnose          | 8.0±0.1bcd | 5.8±0.1d   |
| Alternaria spp            | 6.2±0.3de  | 5.5±0.1de  |
| Fusarium oxysporium       | 9.03±0.3bc | 7.0±0.1c   |
| Schelcht                  |            |            |
| F.equiseti                | 7.5±0.2cd  | 8.0±0.5abc |
| Fusarium verticillioides  | 7.6±0.3cd  | 6.0±0.3cd  |

**Table S3.** Effects of biocontrol bacteria on the in vitro leaves of tomato gray mold.

| treatment    | Incidence /% | Disease index | Prevention effect /% |
|--------------|--------------|---------------|----------------------|
| Pyrimethanil | 20.17cd      | 14.07b        | 76.47a               |
| CQ-4         | 33.24b       | 17.03c        | 71.52c               |
| WZ-37        | 21.35c       | 15.33b        | 74.36b               |
| CK           | 93.33a       | 59.81a        | -                    |

**Table S4.** Effects of biocontrol bacteria on the in vitro fruits of tomato gray mold.

| treatment    | Incidence /% | Disease index | Prevention effect /% |
|--------------|--------------|---------------|----------------------|
| Pyrimethanil | 16.67c       | 13.33b        | 64.71ab              |
| WZ-37        | 20.43d       | 15.78c        | 58.23b               |
| CQ-4         | 15.58b       | 12.85b        | 65.98a               |
| CK           | 53.33a       | 37.78a        | -                    |

**Table S5.** The determination of antagonistic activity by biocontrol bacteria.

| Identification index              | CQ-4 | WZ-37 |
|-----------------------------------|------|-------|
| Secret organophosphate            | +    | -     |
| Secretion of inorganic phosphorus | +    | -     |
| Nitrogen Fixation Ability         | +    | +     |
| Protease                          | +    | -     |
| Cellulase                         | +    | +     |
| Chitinase                         | -    | -     |
| Glucanase                         | -    | -     |
| Siderophore                       | +    | +     |
| HCN                               | -    | -     |
